# Supplementary material for: Hungarian PROMIS-29+2: psychometric properties and population reference values
Source: Springer Nature journal article supplement (doi:10.1007/s11136-023-03364-7), 2023-02-15
Supplement: MOESM1 [file 24033220]

## Supplementary Information

### **Hungarian PROMIS-29+2: psychometric properties and population reference values**

Balázs Jenei, Alex Bató, Ariel Z. Mitev, Valentin Brodszky, Fanni Rencz

#### **Correspondence:**

Fanni Rencz  
Department of Health Policy  
Corvinus University of Budapest  
Address: 8 Fővám tér, H-1093 Budapest, Hungary  
E-mail: fanni.rencz@uni-corvinus.hu

**Online Resource 1** Chen and Thissen's indices (above the diagonal) and local dependence matrix (below the diagonal)

**Online Resource 2** Item mean scores conditional on total score minus item score (monotonicity)

**Online Resource 3** Item characteristic curves for six PROMIS-29+2 domains

**Online Resource 4** Age DTF of the physical function domain of PROMIS-29+2

**Online Resource 5** Spearman's correlation matrix between PROMIS-29+2 domains and pain intensity scale

**Online Resource 6** Spearman's correlation matrix between SF-36 domains

**Online Resource 1 Chen and Thissen's indices (above the diagonal) and local dependence matrix (below the diagonal)**

|                          |                       |                       |                       |                       |
|--------------------------|-----------------------|-----------------------|-----------------------|-----------------------|
| <b>Physical function</b> | <b>PFA11</b>          | <b>PFA21</b>          | <b>PFA23</b>          | <b>PFA53</b>          |
| PFA11                    | -                     | 0.062                 | -0.079                | 0.091                 |
| PFA21                    | 25.92                 | -                     | 0.071                 | -0.07                 |
| PFA23                    | 42.66                 | 34.747                | -                     | 0.058                 |
| PFA53                    | 56.643                | 32.973                | 23.086                | -                     |
| <b>Anxiety</b>           | <b>EDANX01</b>        | <b>EDANX40</b>        | <b>EDANX41</b>        | <b>EDANX53</b>        |
| EDANX01                  | -                     | 0.051                 | -0.073                | -0.091                |
| EDANX40                  | 17.503                | -                     | -0.103                | -0.087                |
| EDANX41                  | 36.441                | 71.46                 | -                     | 0.134                 |
| EDANX53                  | 56.253                | 51.981                | 122.212               | -                     |
| <b>Depression</b>        | <b>EDDEP04</b>        | <b>EDDEP06</b>        | <b>EDDEP29</b>        | <b>EDDEP41</b>        |
| EDDEP04                  | -                     | -0.1                  | -0.076                | -0.144                |
| EDDEP06                  | 68.008                | -                     | -0.103                | -0.192                |
| EDDEP29                  | 39.193                | 72.358                | -                     | 0.121                 |
| EDDEP41                  | 141.661               | 251.199               | 99.227                | -                     |
| <b>Fatigue</b>           | <b>HI7</b>            | <b>AN3</b>            | <b>FATEXP41</b>       | <b>FATEXP40</b>       |
| HI7                      | -                     | -0.117                | -0.199                | 0.29                  |
| AN3                      | 93.873                | -                     | 0.144                 | -0.133                |
| FATEXP41                 | 270.146               | 140.85                | -                     | -0.249                |
| FATEXP40                 | 573.351               | 120.011               | 420.612               | -                     |
| <b>Sleep disturbance</b> | <b>Sleep109</b>       | <b>Sleep116</b>       | <b>Sleep20</b>        | <b>Sleep44</b>        |
| Sleep109                 | -                     | 0.176                 | -1.01                 | -0.331                |
| Sleep116                 | 210.77                | -                     | -0.442                | -0.277                |
| Sleep20                  | 6942.895              | 1329.998              | -                     | 0.13                  |
| Sleep44                  | 744.461               | 523.222               | 115.158               | -                     |
| <b>Social roles</b>      | <b>SRPPER11_Ca PS</b> | <b>SRPPER18_Ca PS</b> | <b>SRPPER23_Ca PS</b> | <b>SRPPER46_Ca PS</b> |
| SRPPER11_Ca PS           | -                     | -0.159                | -0.082                | -0.211                |
| SRPPER18_Ca PS           | 170.985               | -                     | -0.109                | -0.172                |
| SRPPER23_Ca PS           | 45.251                | 80.85                 | -                     | 0.171                 |
| SRPPER46_Ca PS           | 303.114               | 201.903               | 198.827               | -                     |
| <b>Pain interference</b> | <b>PAININ9</b>        | <b>PAININ22</b>       | <b>PAININ31</b>       | <b>PAININ34</b>       |
| PAININ9                  | -                     | -1.386                | -0.121                | -0.578                |
| PAININ22                 | 13064.97              | -                     | -0.461                | -0.595                |
| PAININ31                 | 99.23                 | 1445.764              | -                     | 0.224                 |
| PAININ34                 | 2273.466              | 2405.994              | 340.236               | -                     |

Online Resource 2 Item mean scores conditional on total score minus item score  
(monotonicity)

Physical Function

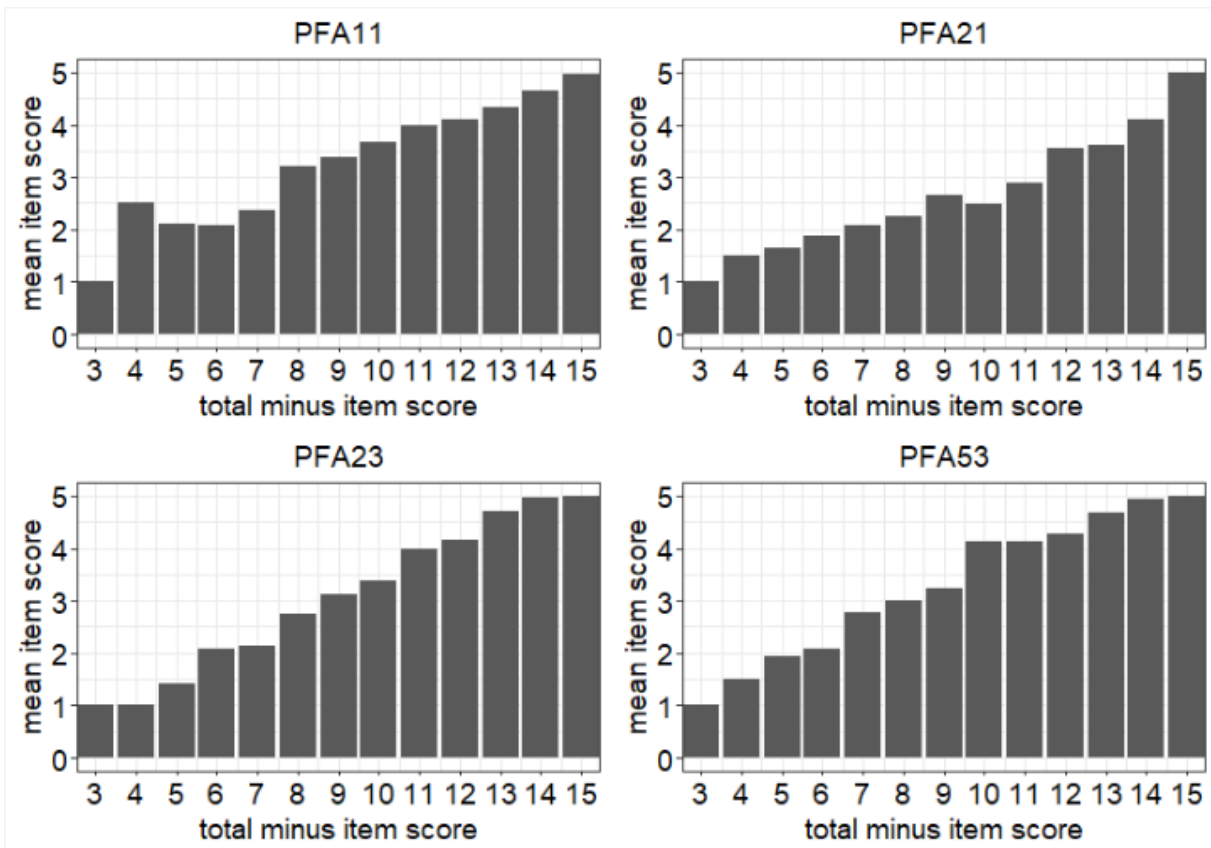

Anxiety

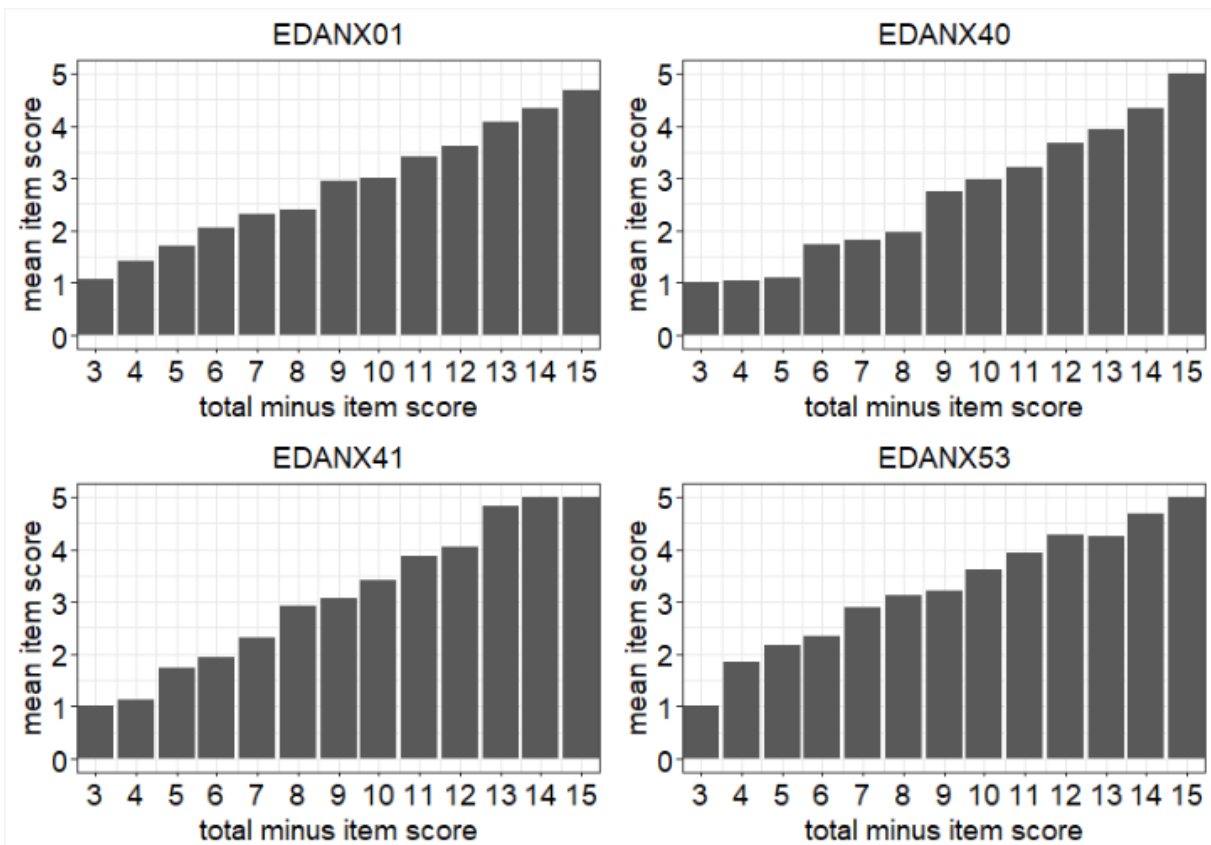

## Depression

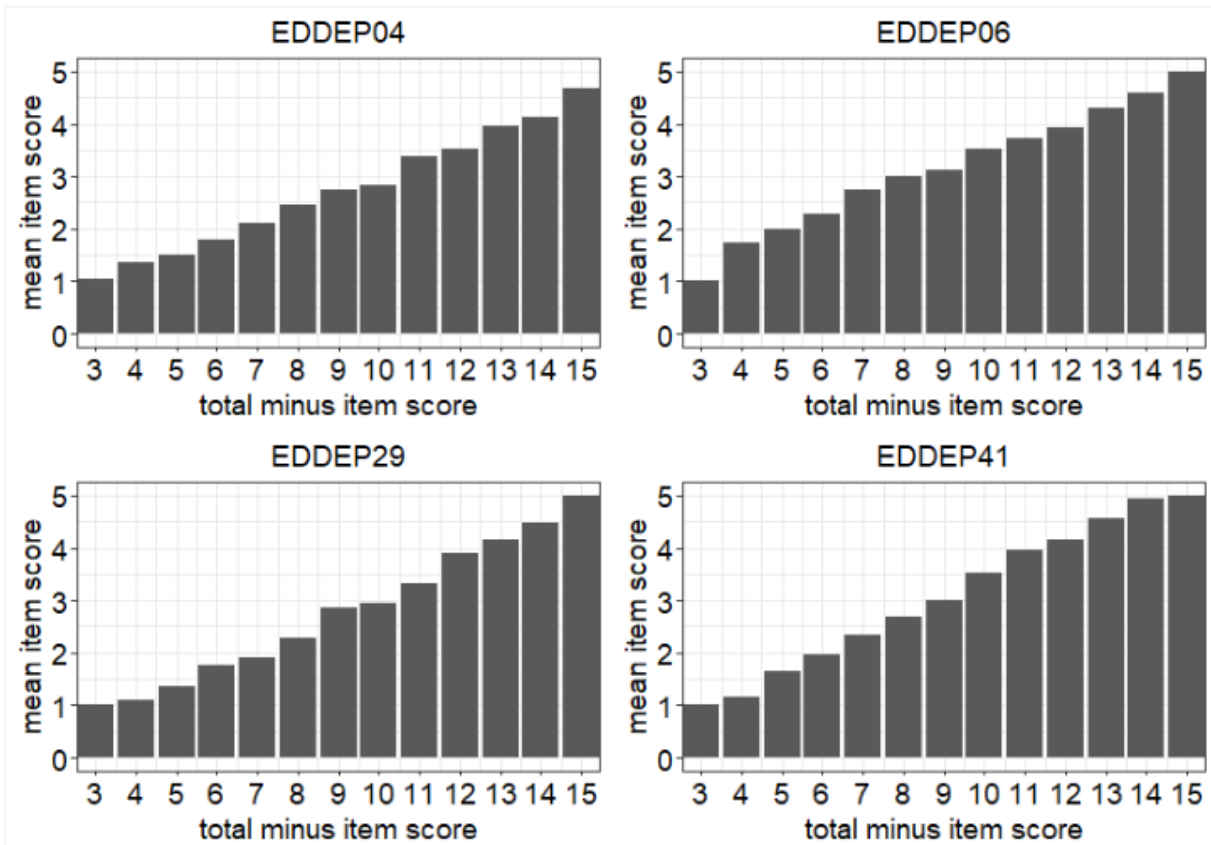

## Fatigue

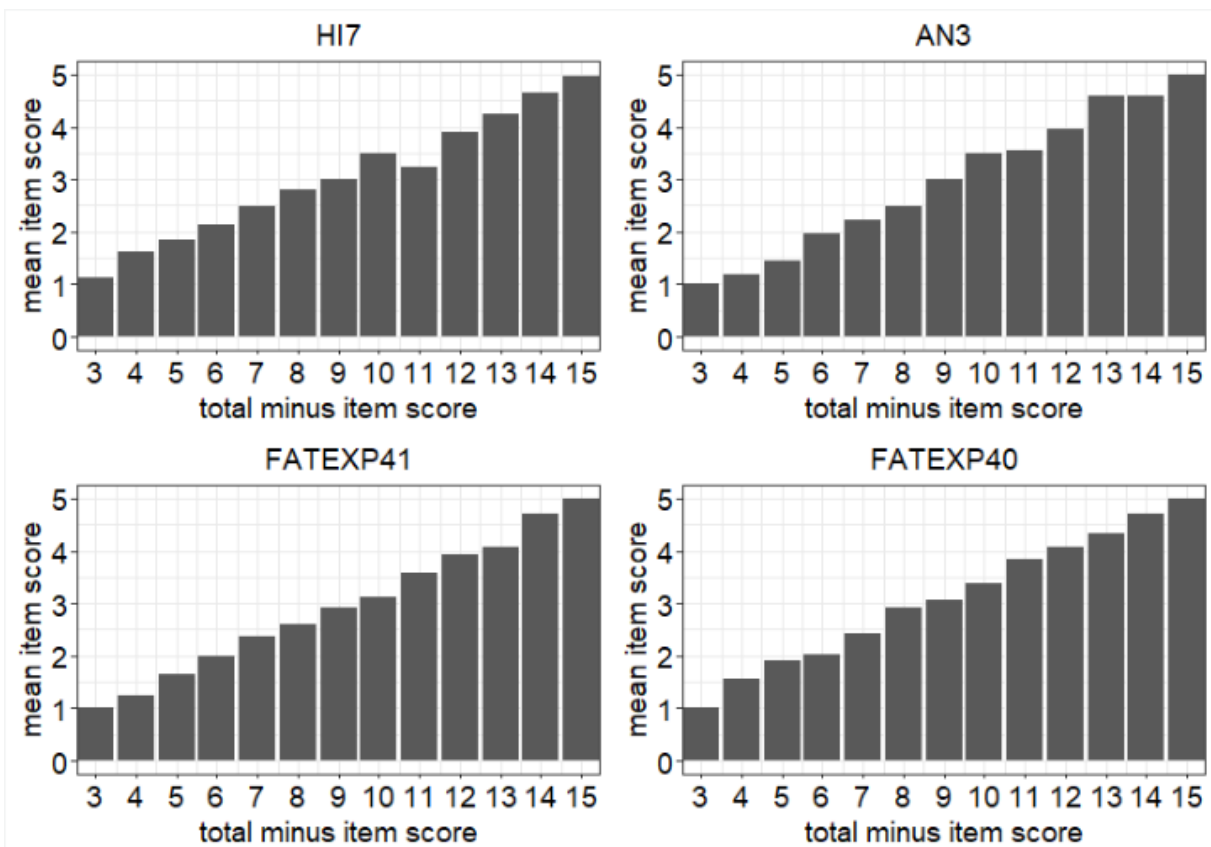

## Sleep disturbance

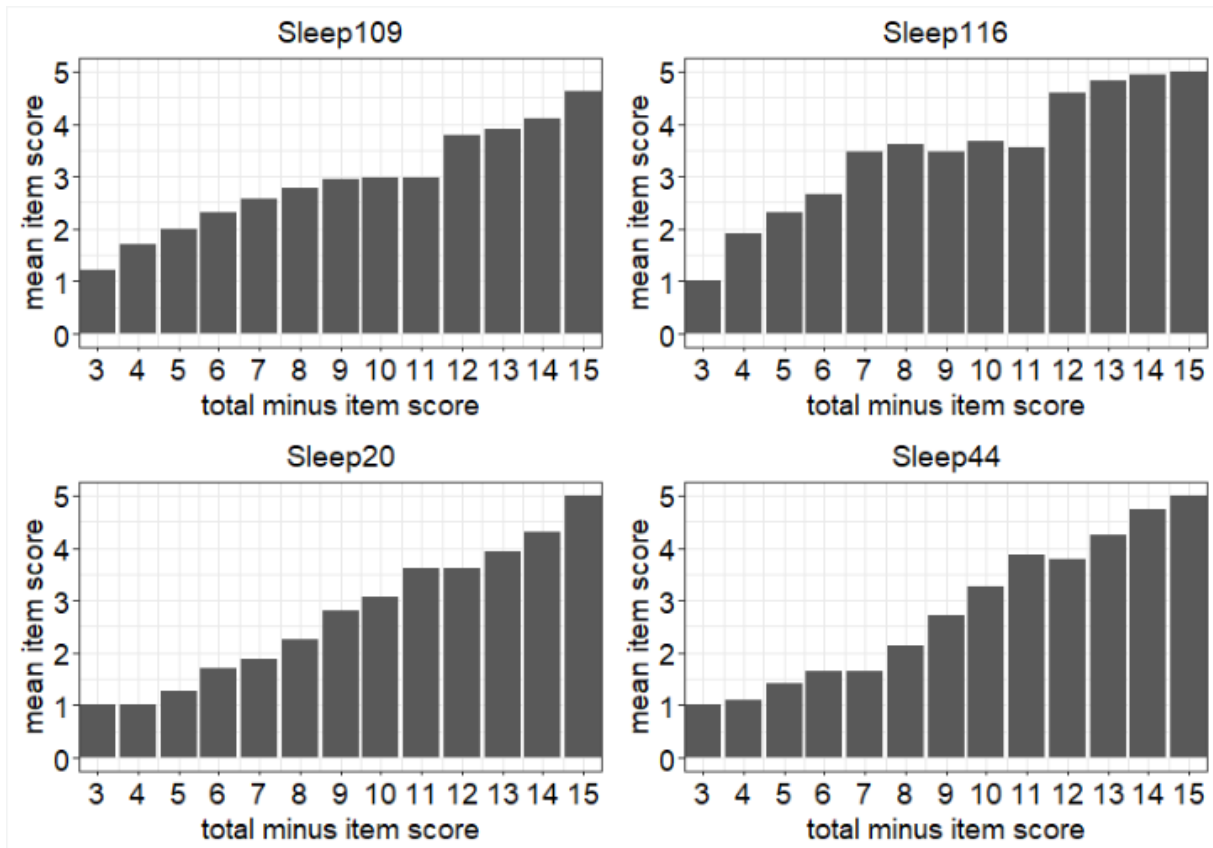

## Social Roles

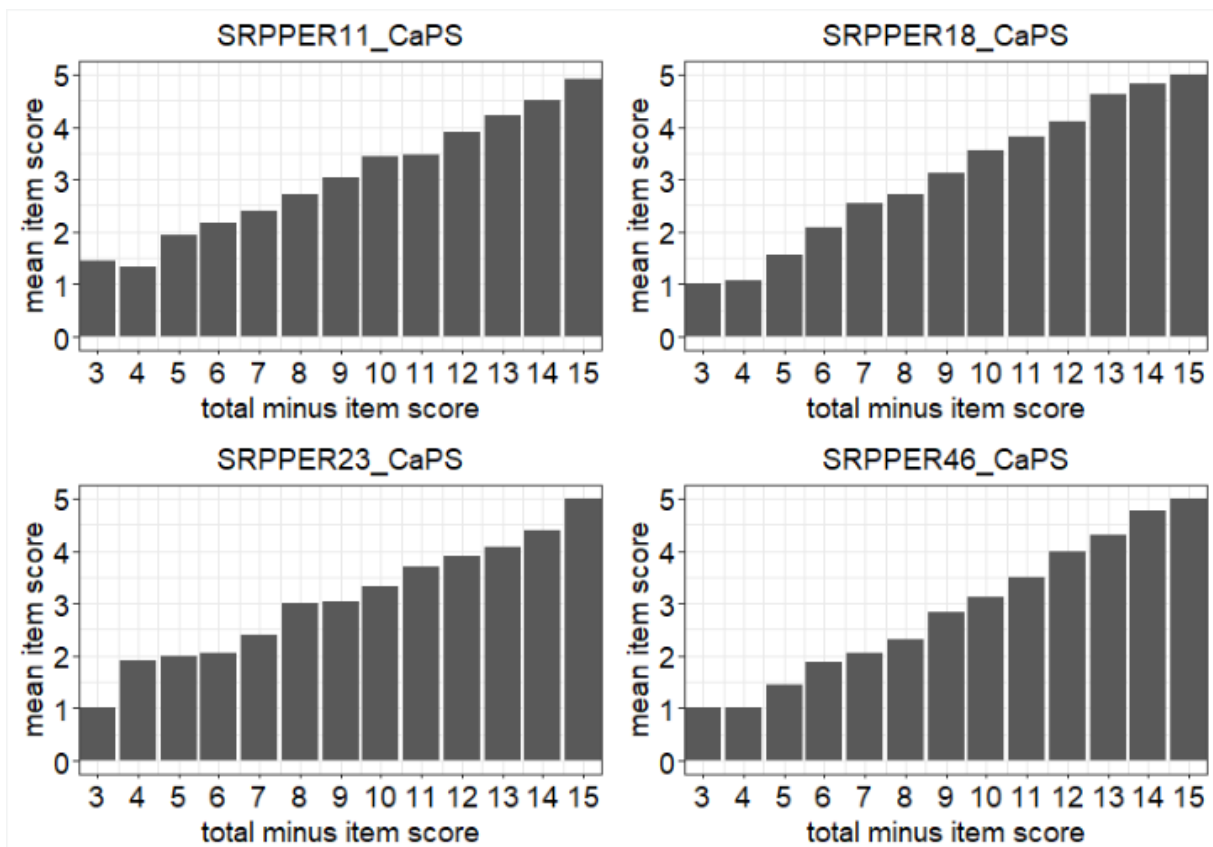

## Pain Interference

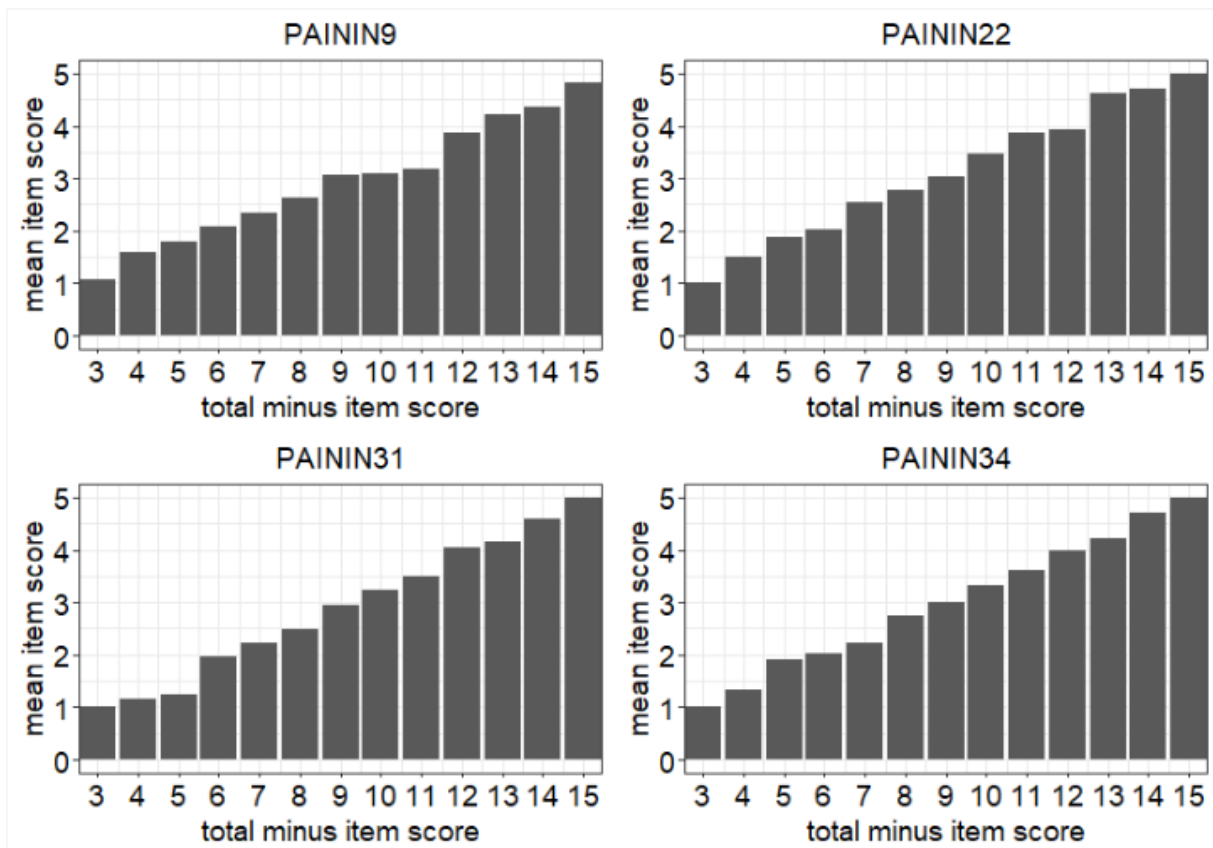

# Online Resource 3 Item characteristic curves for six PROMIS-29+2 domains

## Physical function

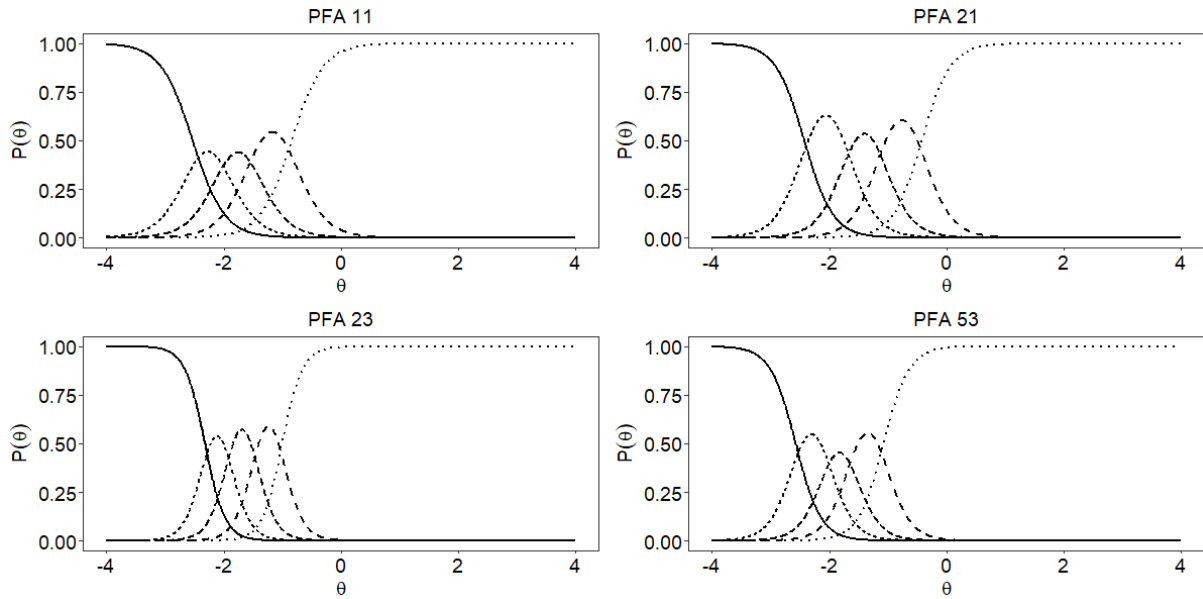

## Anxiety

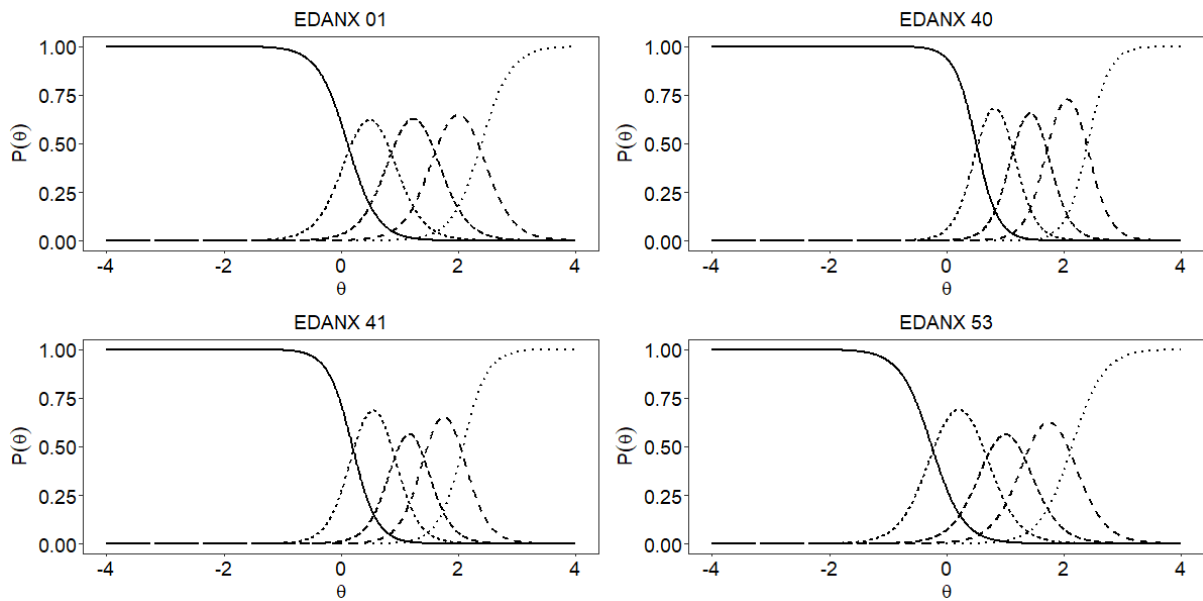

## Depression

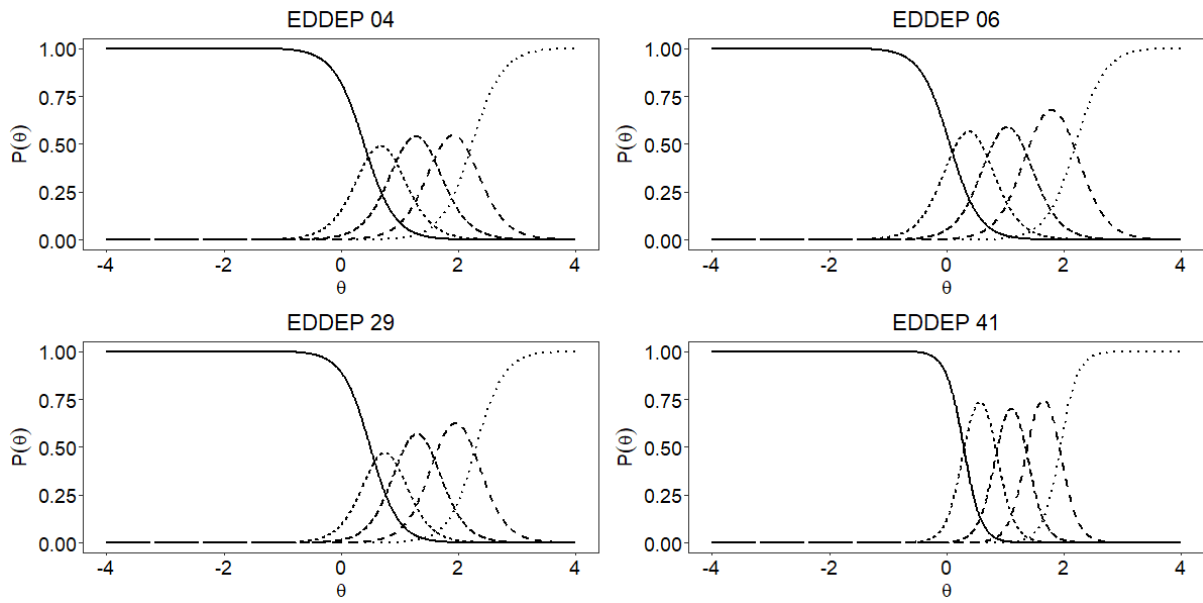

## Fatigue

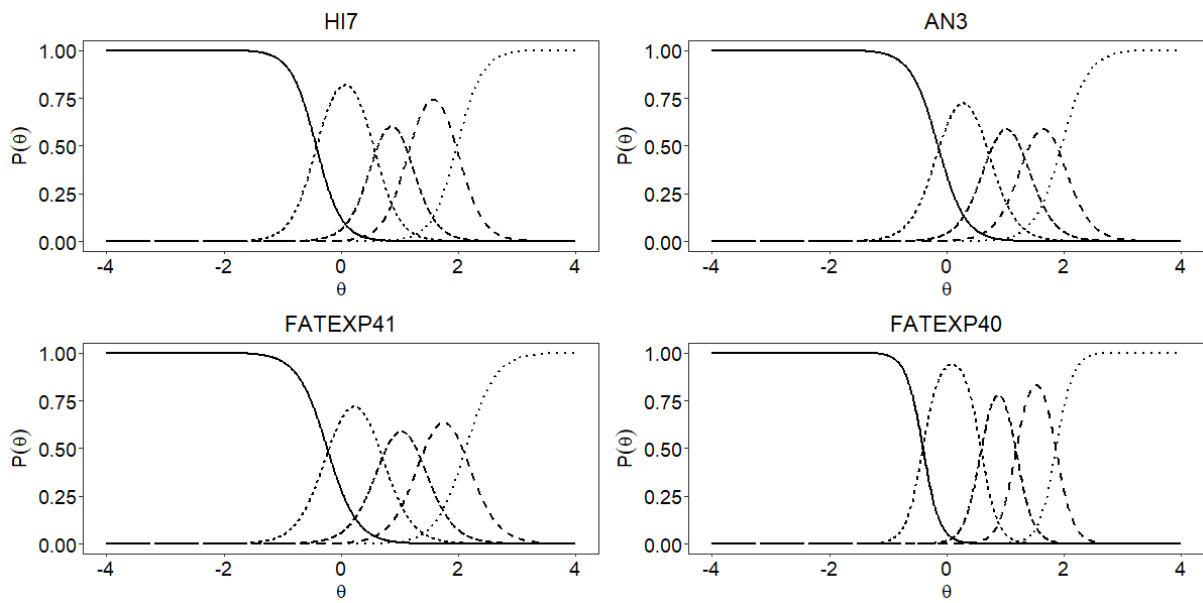



## Social roles

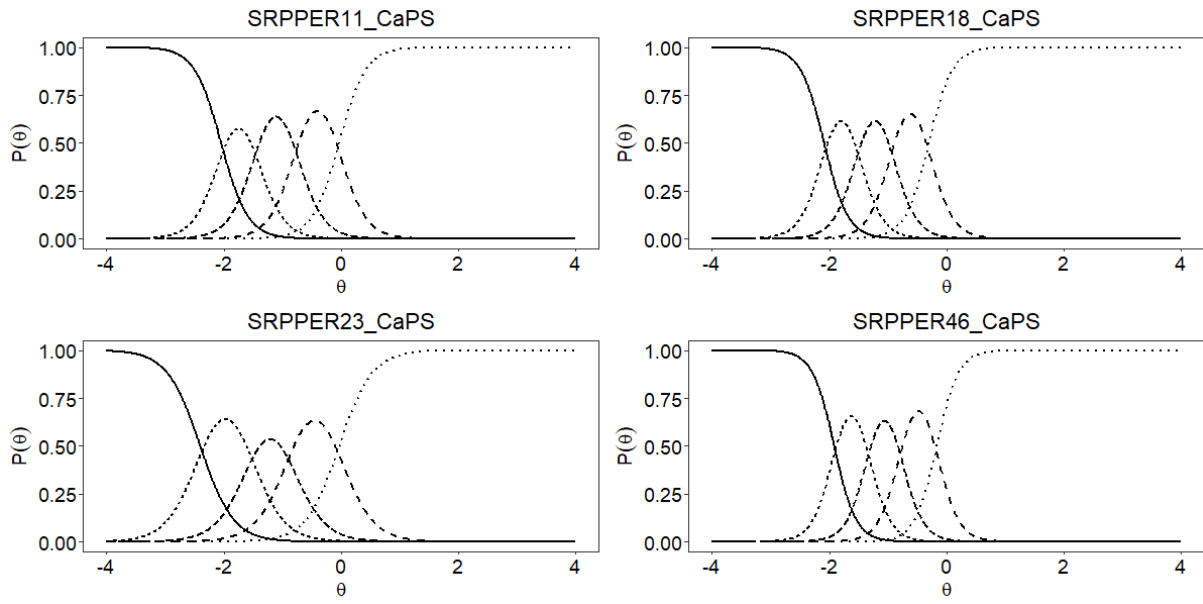

## Pain interference

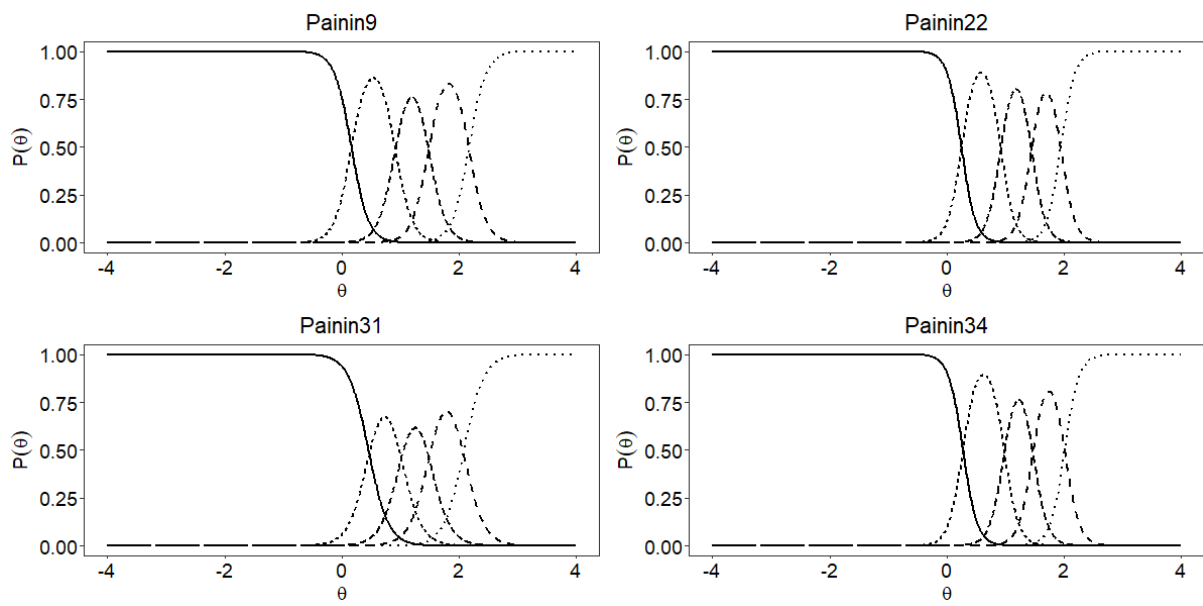

**Online Resource 4 Age DTF of the physical function domain of PROMIS-29+2**

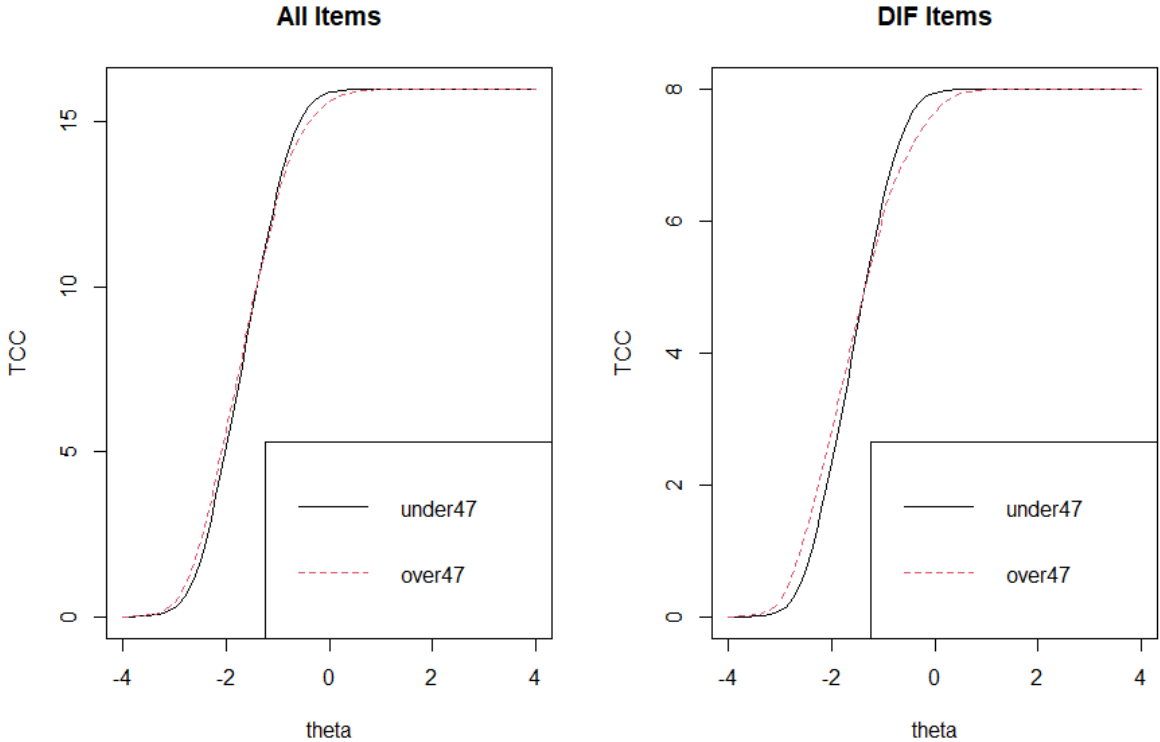

DTF=differential test functioning, TCC = test characteristic curve

**Online Resource 5 Spearman's correlation matrix between PROMIS-29+2 domains and pain intensity scale**

| <b>PROMIS-29+2</b>                                           | <b>Physical function</b> | <b>Anxiety</b> | <b>Depression</b> | <b>Fatigue</b> | <b>Sleep disturbance</b> | <b>Ability to participate in social roles and activities</b> | <b>Pain interference</b> | <b>Cognitive function</b> | <b>Pain intensity (0-10)</b> |
|--------------------------------------------------------------|--------------------------|----------------|-------------------|----------------|--------------------------|--------------------------------------------------------------|--------------------------|---------------------------|------------------------------|
| <b>Physical function</b>                                     | -                        |                |                   |                |                          |                                                              |                          |                           |                              |
| <b>Anxiety</b>                                               | -0.28                    | -              |                   |                |                          |                                                              |                          |                           |                              |
| <b>Depression</b>                                            | -0.31                    | 0.78           | -                 |                |                          |                                                              |                          |                           |                              |
| <b>Fatigue</b>                                               | -0.39                    | 0.65           | 0.64              | -              |                          |                                                              |                          |                           |                              |
| <b>Sleep disturbance</b>                                     | -0.30                    | 0.45           | 0.44              | 0.53           | -                        |                                                              |                          |                           |                              |
| <b>Ability to participate in social roles and activities</b> | 0.55                     | -0.54          | -0.57             | -0.61          | -0.44                    | -                                                            |                          |                           |                              |
| <b>Pain interference</b>                                     | -0.60                    | 0.38           | 0.40              | 0.50           | 0.39                     | -0.61                                                        | -                        |                           |                              |
| <b>Cognitive function</b>                                    | 0.18                     | -0.33          | -0.36             | -0.32          | -0.33                    | 0.32                                                         | -0.25                    | -                         |                              |
| <b>Pain intensity (0-10)</b>                                 | -0.49                    | 0.35           | 0.36              | 0.50           | 0.39                     | -0.49                                                        | 0.74                     | -0.25                     | -                            |

For PROMIS-29+2 scales of function (i.e. physical function, social roles and cognitive function) a higher score corresponds to a better HRQoL and for symptoms (i.e. anxiety, depression, fatigue, sleep disturbance and pain interference) a higher score corresponds to worse HRQoL. HRQoL = health-related quality of life  
 $p < 0.05$  for all correlation coefficients.

**Online Resource 6 Spearman's correlation matrix between SF-36 domains**

| <b>SF-36</b> | <b>PF</b> | <b>RP</b> | <b>RE</b> | <b>VT</b> | <b>MH</b> | <b>SF</b> | <b>BP</b> | <b>GH</b> |
|--------------|-----------|-----------|-----------|-----------|-----------|-----------|-----------|-----------|
| <b>PF</b>    | -         |           |           |           |           |           |           |           |
| <b>RP</b>    | 0.65      | -         |           |           |           |           |           |           |
| <b>RE</b>    | 0.42      | 0.62      | -         |           |           |           |           |           |
| <b>VT</b>    | 0.39      | 0.46      | 0.50      | -         |           |           |           |           |
| <b>MH</b>    | 0.29      | 0.35      | 0.46      | 0.81      | -         |           |           |           |
| <b>SF</b>    | 0.39      | 0.47      | 0.51      | 0.59      | 0.62      | -         |           |           |
| <b>BP</b>    | 0.61      | 0.62      | 0.46      | 0.53      | 0.43      | 0.51      | -         |           |
| <b>GH</b>    | 0.63      | 0.52      | 0.42      | 0.56      | 0.48      | 0.47      | 0.56      | -         |

BP=bodily pain; GH=general health; MH=mental health; PF = physical functioning; RE=role limitations due to emotional problems; RP=role limitations due to physical health; SF=social functioning; VT=vitality  
 $p < 0.05$  for all correlation coefficients.
